# Supplementary material for: Palladium-anchored donor-flexible pyridylidene amide (PYA) electrocatalysts for CO 2 reduction
Source: Royal Society of Chemistry journal article supplement (doi:10.1039/d3ra06477h), 2023-01-01
Supplement: d3ra06477h1.pdf [file d3ra06477h1.pdf]

## Palladium Anchored Donor Flexible Pyridylidene Amide (PYA) Electrocatalysts for CO<sub>2</sub> Reduction

Afshan Khurshid<sup>†a</sup>, Tania Tanveer<sup>†a</sup>, Komal Hafeez<sup>†a</sup>, Maqsood Ahmed<sup>b</sup>, Zareen Akhtar<sup>a</sup>, M.

Naveed Zafar<sup>a\*</sup>

<sup>a</sup> Department of Chemistry, Quaid-i-Azam University, Islamabad, 45320, Pakistan

<sup>b</sup> Materials Chemistry Laboratory, Department of Chemistry, The Islamia University of  
Bahawalpur, 63100, Pakistan

<sup>†</sup>Authors contributed equally to this manuscript

\*For correspondence, email to [mnzafar@qau.edu.pk](mailto:mnzafar@qau.edu.pk)

| <b>Content</b>                                        | <b>Pages</b> |
|-------------------------------------------------------|--------------|
| Figure S1.1. <sup>1</sup> H NMR spectrum of <b>1</b>  | S3           |
| Figure S1.2. <sup>13</sup> C NMR spectrum of <b>1</b> | S3           |
| Figure 1.3. Representative FT-IR spectrum of <b>1</b> | S4           |
| Figure S2.1. <sup>1</sup> H NMR spectrum of <b>2</b>  | S4           |
| Figure S2.2. <sup>13</sup> C NMR spectrum of <b>2</b> | S5           |
| Figure 2.3. Representative FT-IR spectrum of <b>2</b> | S5           |
| Figure S3.1. <sup>1</sup> H NMR spectrum of <b>3</b>  | S6           |
| Figure S3.2. <sup>13</sup> C NMR spectrum of <b>3</b> | S6           |
| Figure 3.3. Representative FT-IR spectrum of <b>3</b> | S7           |
| Figure S4.1. <sup>1</sup> H NMR spectrum of <b>4</b>  | S7           |
| Figure S4.2. <sup>13</sup> C NMR spectrum of <b>4</b> | S8           |
| Figure 4.3. Representative FT-IR spectrum of <b>4</b> | S8           |
| Figure S5.1. <sup>1</sup> H NMR spectrum of <b>5</b>  | S9           |
| Figure S5.2. <sup>13</sup> C NMR spectrum of <b>5</b> | S9           |
| Figure 5.3. Representative FT-IR spectrum of <b>5</b> | S10          |
| Figure S6.1. <sup>1</sup> H NMR spectrum of <b>6</b>  | S10          |
| Figure S6.2. <sup>13</sup> C NMR spectrum of <b>6</b> | S11          |
| Figure 6.3. Representative FT-IR spectrum of <b>6</b> | S11          |
| Figure S7.1. <sup>1</sup> H NMR spectrum of <b>7</b>  | S12          |
| Figure S7.2. <sup>13</sup> C NMR spectrum of <b>7</b> | S12          |
| Figure 7.3. Representative FT-IR spectrum of <b>7</b> | S13          |
| Figure S8.1. <sup>1</sup> H NMR spectrum of <b>8</b>  | S13          |
| Figure S8.2. <sup>13</sup> C NMR spectrum of <b>8</b> | S14          |
| Figure 8.3. Representative FT-IR spectrum of <b>8</b> | S14          |
| Figure S9.1. <sup>1</sup> H NMR spectrum of <b>9</b>  | S15          |
| Figure S9.2. <sup>13</sup> C NMR spectrum of <b>9</b> | S15          |
| Figure 9.3. Representative FT-IR spectrum of <b>9</b> | S16          |

|                                                                                                                                                                                                                                                                          |     |
|--------------------------------------------------------------------------------------------------------------------------------------------------------------------------------------------------------------------------------------------------------------------------|-----|
| Figure S10.1. $^1\text{H}$ NMR spectrum of <b>10</b>                                                                                                                                                                                                                     | S16 |
| Figure S10.2. $^{13}\text{C}$ NMR spectrum of <b>10</b>                                                                                                                                                                                                                  | S17 |
| Figure 10.3. Representative FT-IR spectrum of <b>10</b>                                                                                                                                                                                                                  | S17 |
| Figure S11.1. $^1\text{H}$ NMR spectrum of <b>11</b>                                                                                                                                                                                                                     | S18 |
| Figure S11.2. $^{13}\text{C}$ NMR spectrum of <b>11</b>                                                                                                                                                                                                                  | S18 |
| Figure 11.3. Representative FT-IR spectrum of <b>11</b>                                                                                                                                                                                                                  | S19 |
| Crystals Data                                                                                                                                                                                                                                                            | S20 |
| Figure S12. ORTEP diagrams of <b>2</b> and <b>4</b>                                                                                                                                                                                                                      | S20 |
| Figure S13. ORTEP diagrams of <b>11</b>                                                                                                                                                                                                                                  | S21 |
| Electrochemical Data                                                                                                                                                                                                                                                     | S22 |
| Figure S14. Cyclic voltammograms of <b>7</b> under nitrogen, $\text{CO}_2$ at different scan rates. All experiments were performed at $100 \text{ mVs}^{-1}$ scan rate in DMF and $0.1 \text{ M}$ supporting electrolyte $[\text{n Bu}_4\text{N}]\text{PF}_6$ .          | S22 |
| Figure S15. Current <i>vs</i> (scan rate) $^{1/2}$ plots of <b>7</b> under nitrogen, $\text{CO}_2$ . All experiments were performed at $100 \text{ mVs}^{-1}$ scan rate in DMF and $0.1 \text{ M}$ supporting electrolyte $[\text{n Bu}_4\text{N}]\text{PF}_6$ .         | S23 |
| Figure S16. Cyclic voltammograms of <b>9</b> under $\text{CO}_2 + \text{TFA}$ at different acid concentration. All experiments were performed at $100 \text{ mVs}^{-1}$ scan rate in DMF and $0.1 \text{ M}$ supporting electrolyte $[\text{n Bu}_4\text{N}]\text{PF}_6$ | S23 |
| References                                                                                                                                                                                                                                                               | S23 |

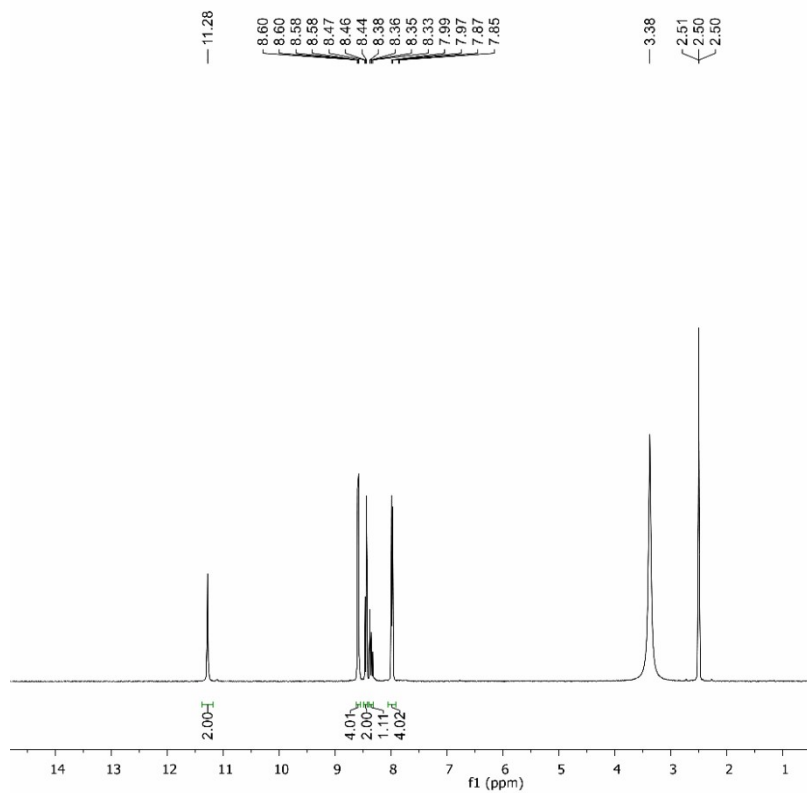

Figure 1.1  $^1\text{H}$  NMR spectrum of **1**

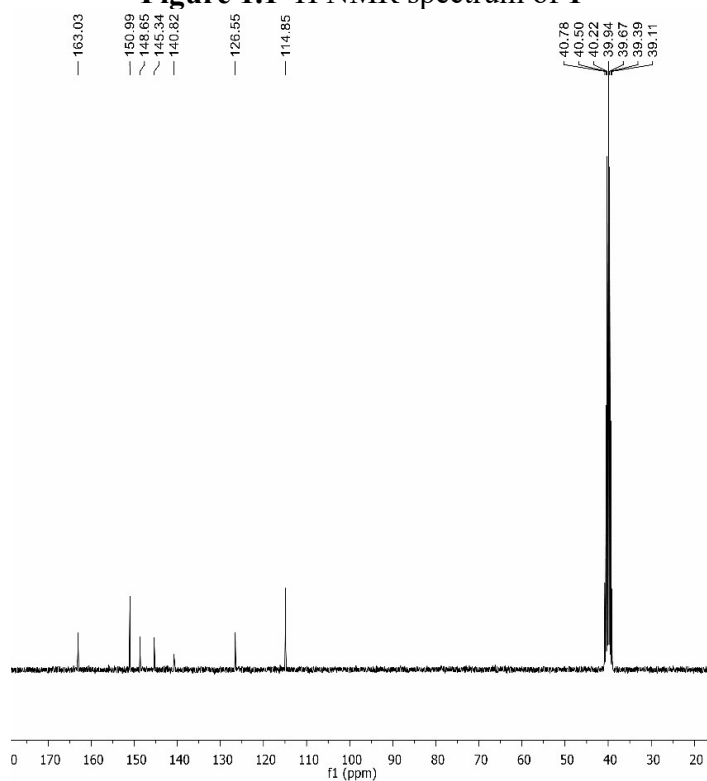

Figure 1.2  $^{13}\text{C}$  NMR spectrum of **1**

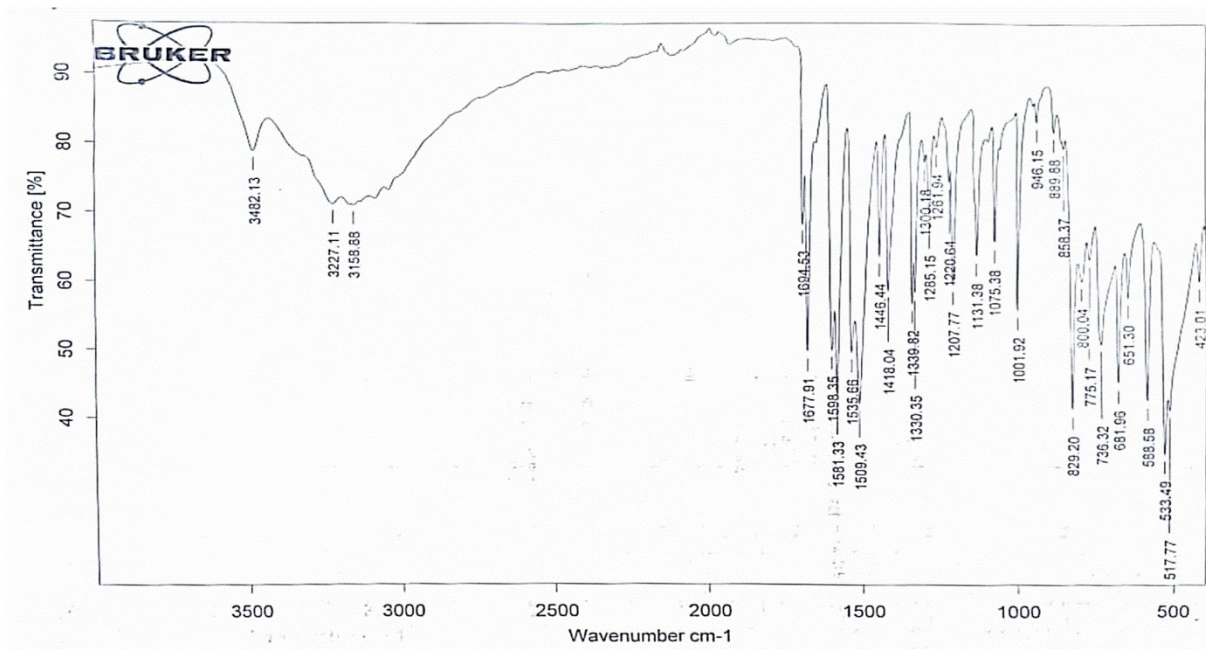

Figure 1.3. Representative FT-IR spectrum of 1

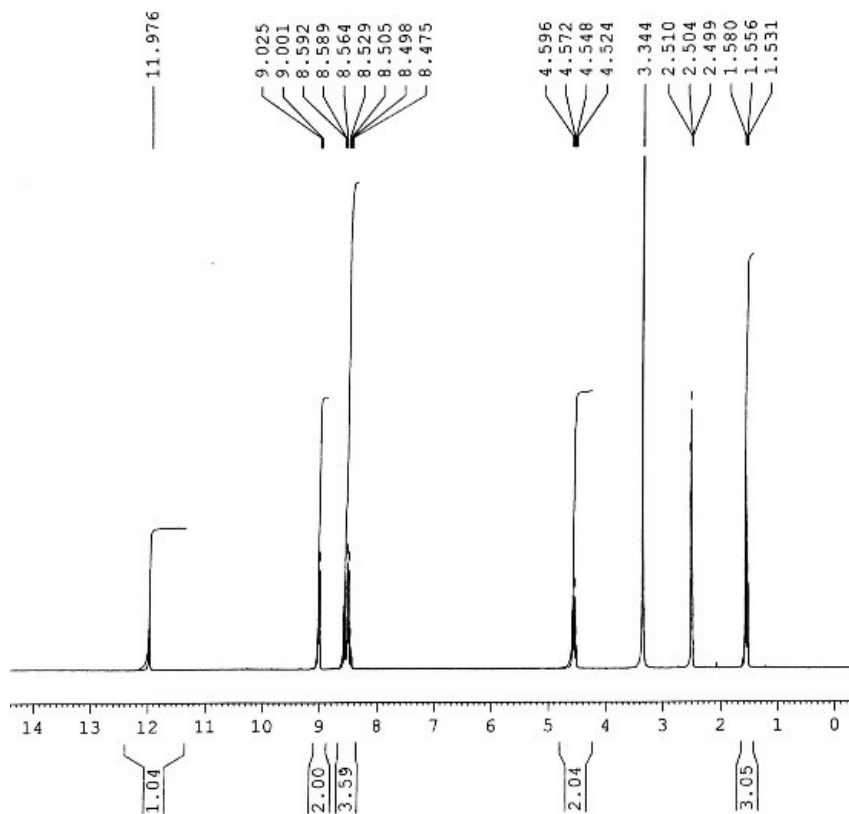

Figure 2.1 <sup>1</sup>H NMR spectrum of 2

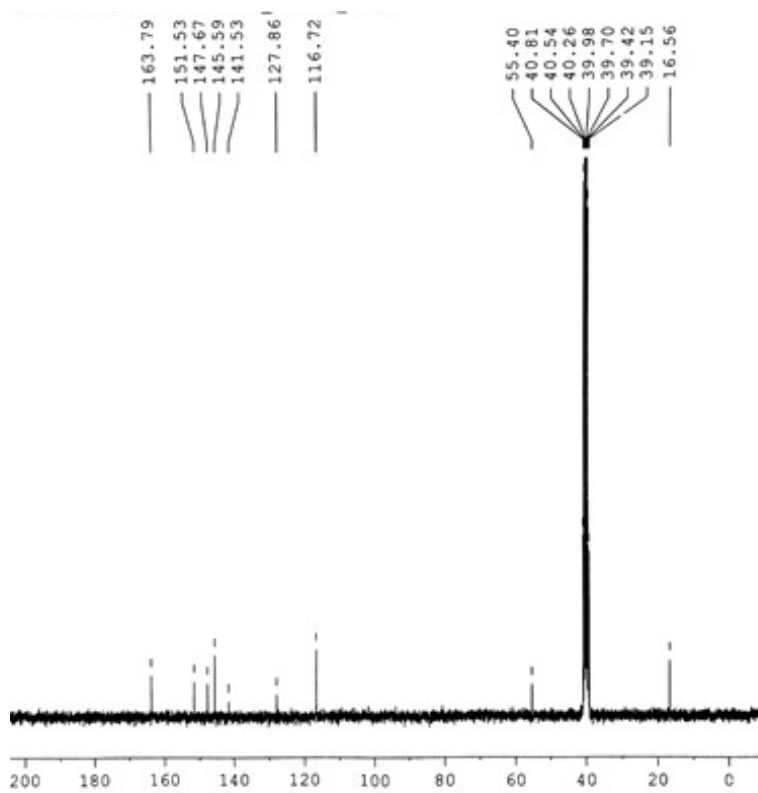

Figure 2.2  $^{13}\text{C}$  NMR spectrum of **2**

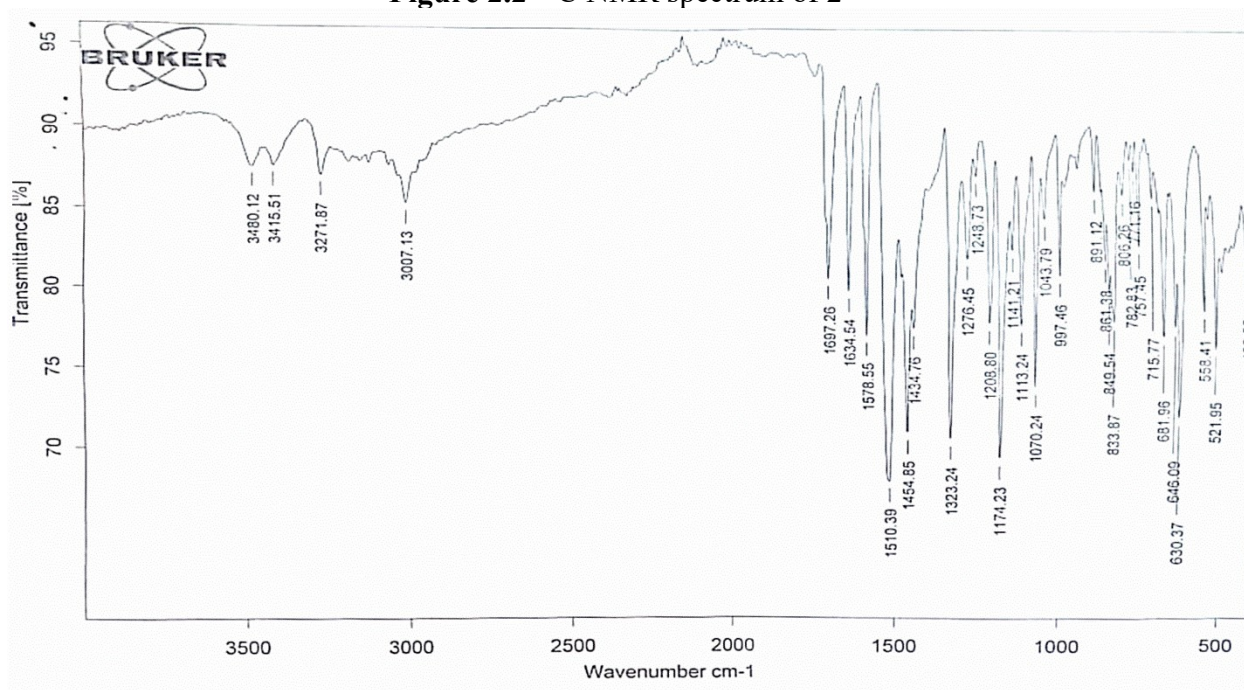

Figure 2.3. Representative FT-IR spectrum of **2**

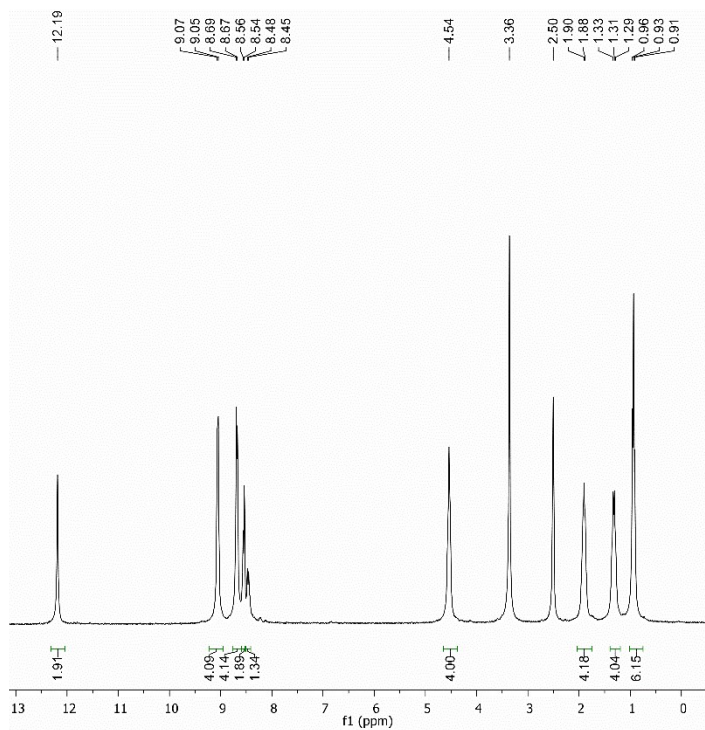

Figure 3.1.  $^1\text{H}$  NMR spectrum of **3**

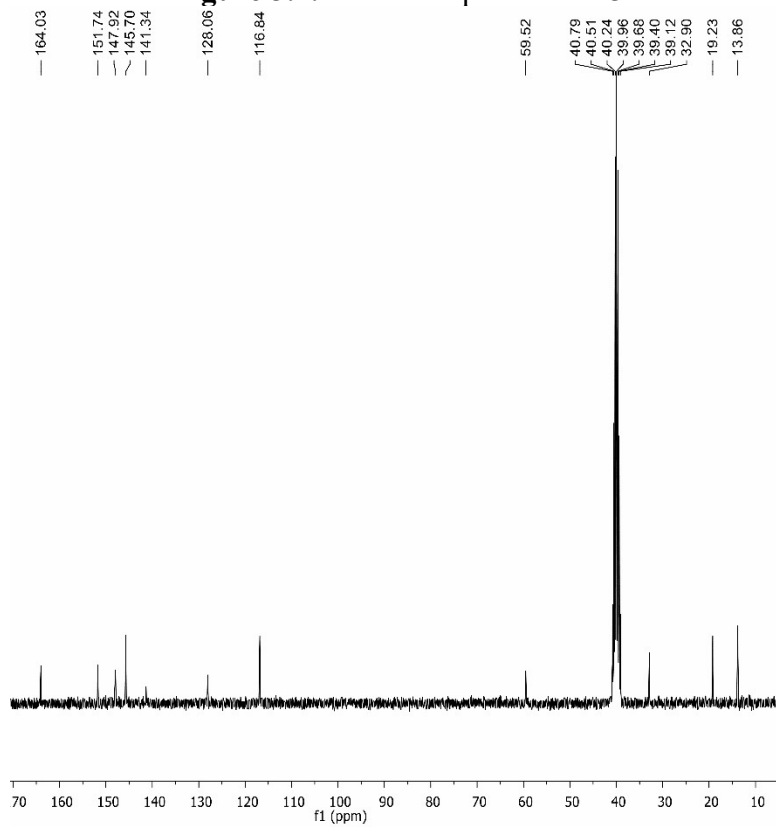

Figure 3.2.  $^{13}\text{C}$  NMR spectrum of **3**



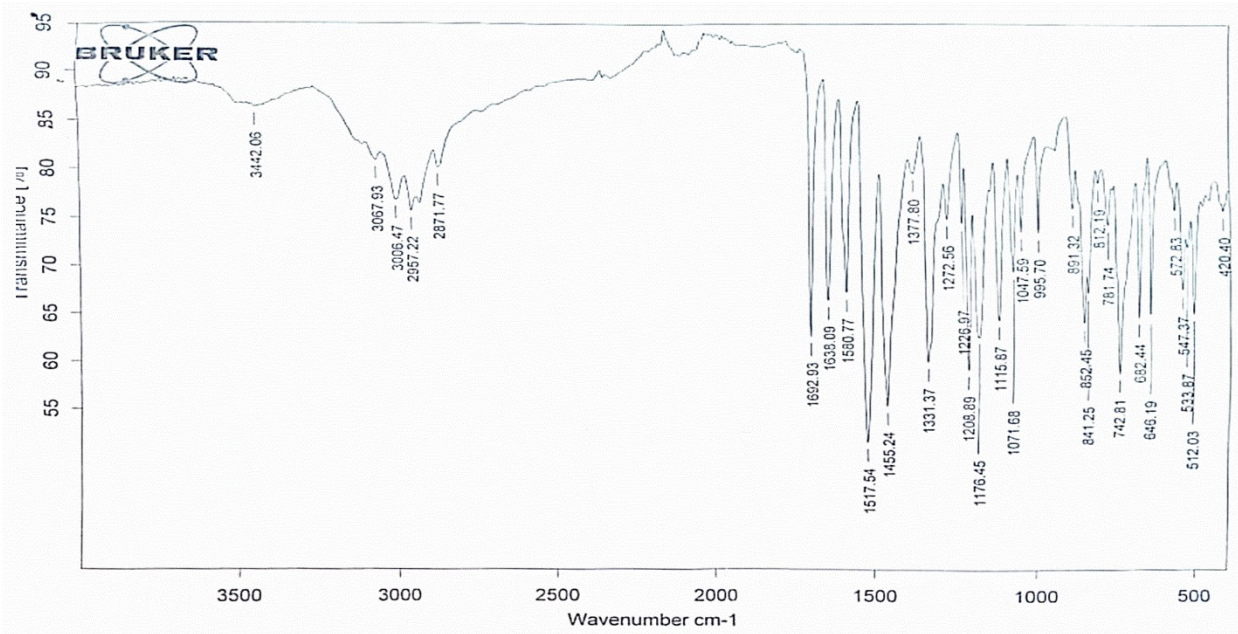

Figure 3.3. Representative FT-IR spectrum of **3**

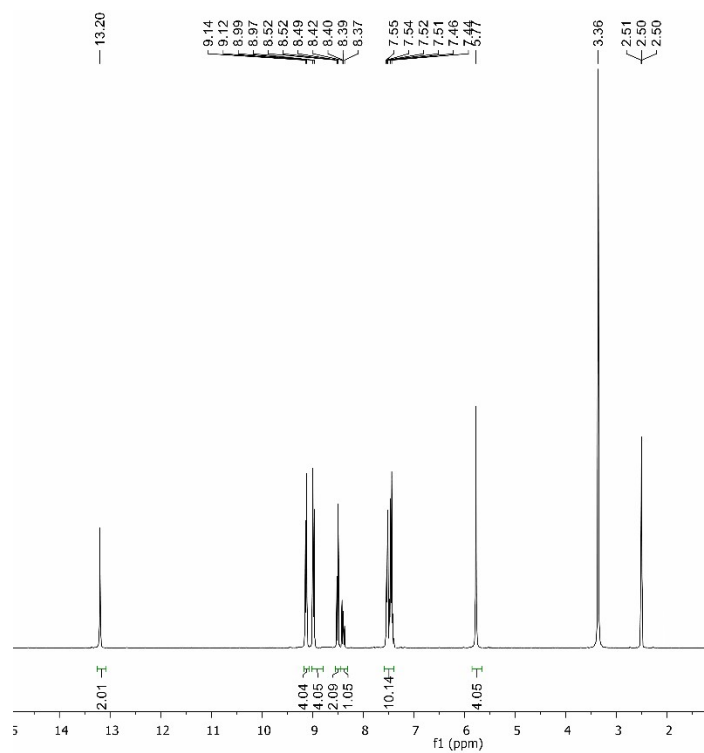

Figure 4.1.  $^1\text{H}$  NMR spectrum of **4**

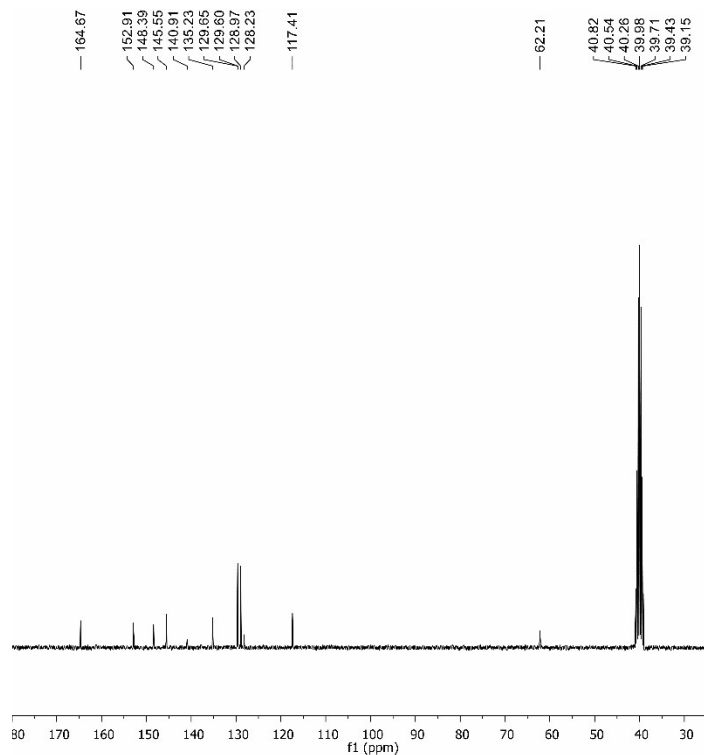

Figure 4.2.  $^{13}\text{C}$  NMR spectrum of **4**

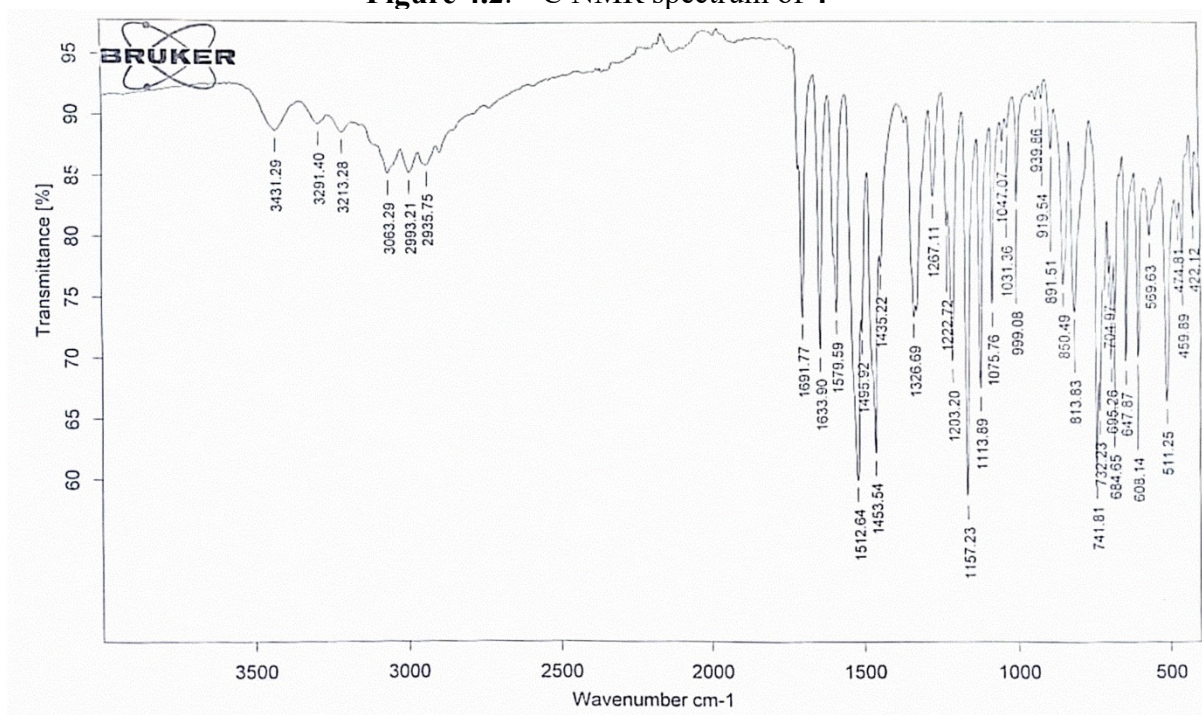

Figure 4.3. Representative FT-IR spectrum of **4**



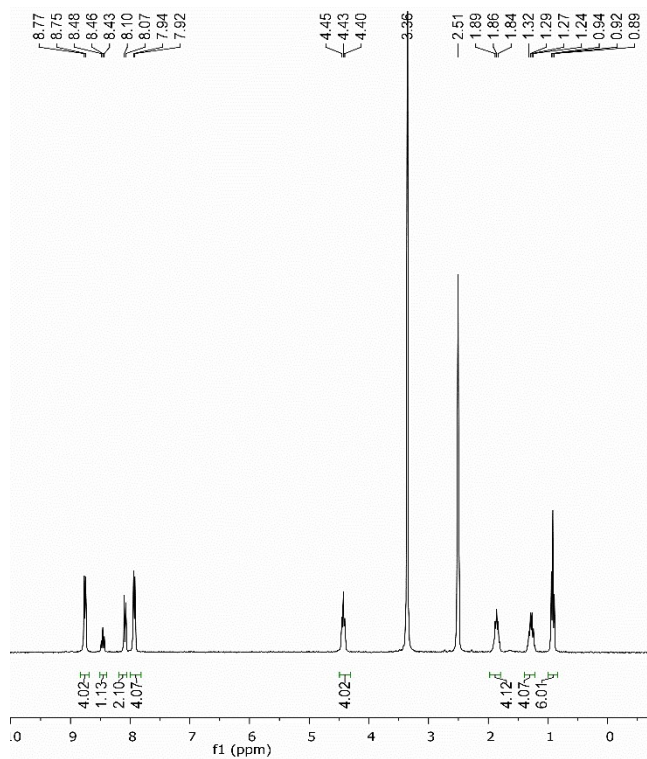

Figure 5.1.  $^1\text{H}$  NMR spectrum of **5**

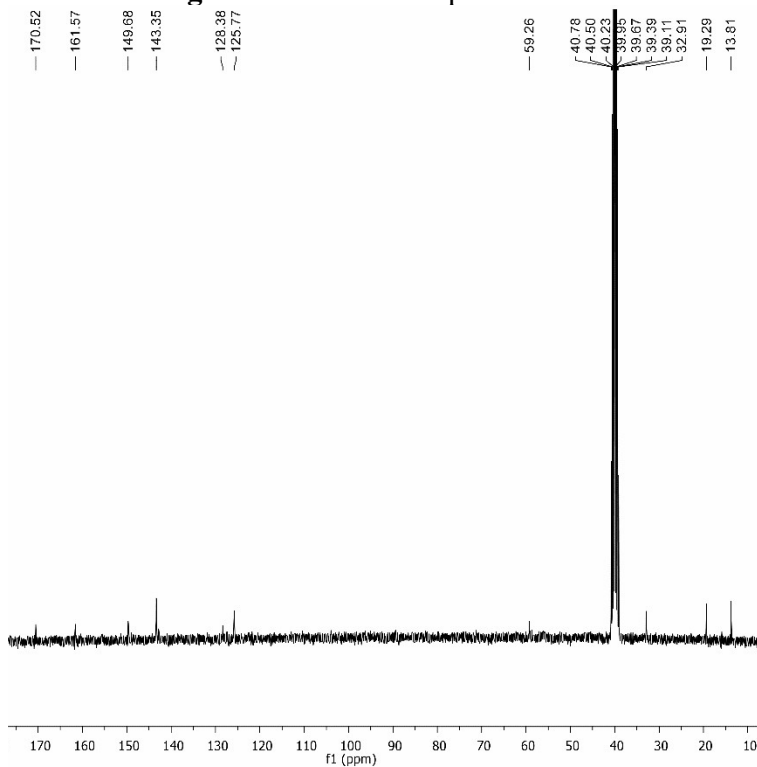

Figure 5.2.  $^{13}\text{C}$  NMR spectrum of **5**

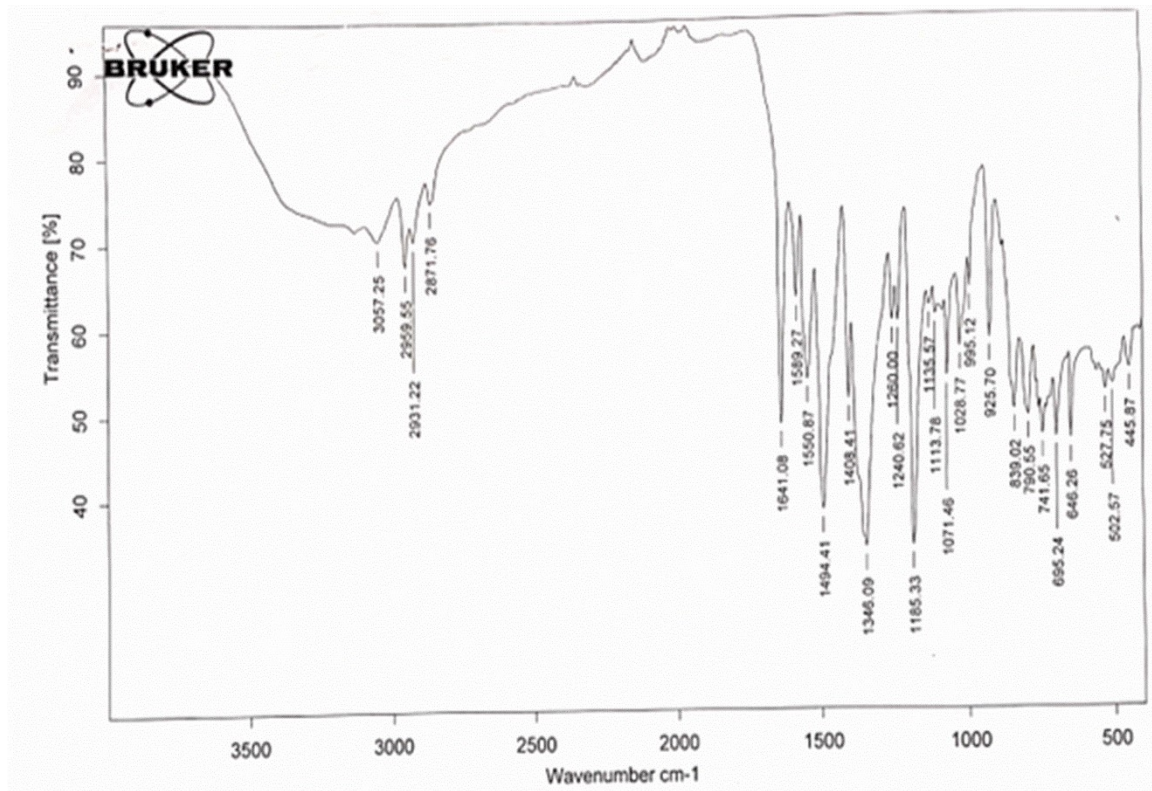

Figure 5.3. Representative FT-IR spectrum of 5

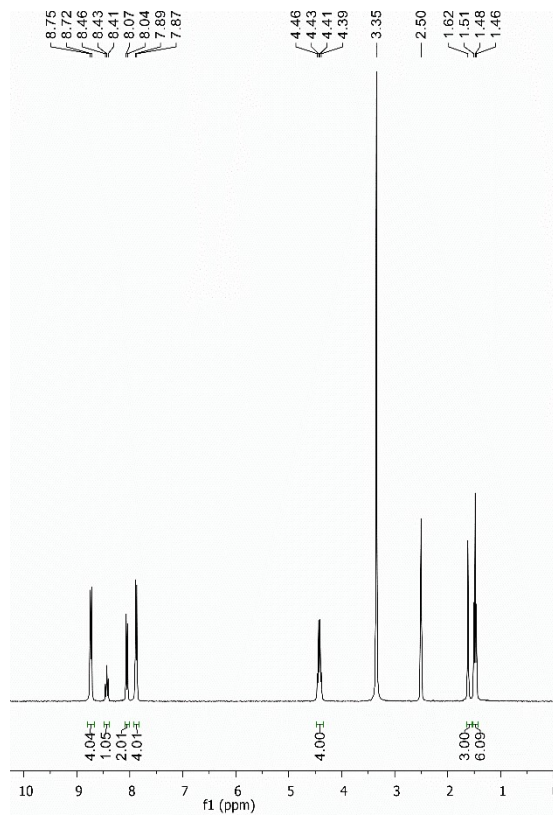

Figure 6.1. <sup>1</sup>H NMR spectrum of 6

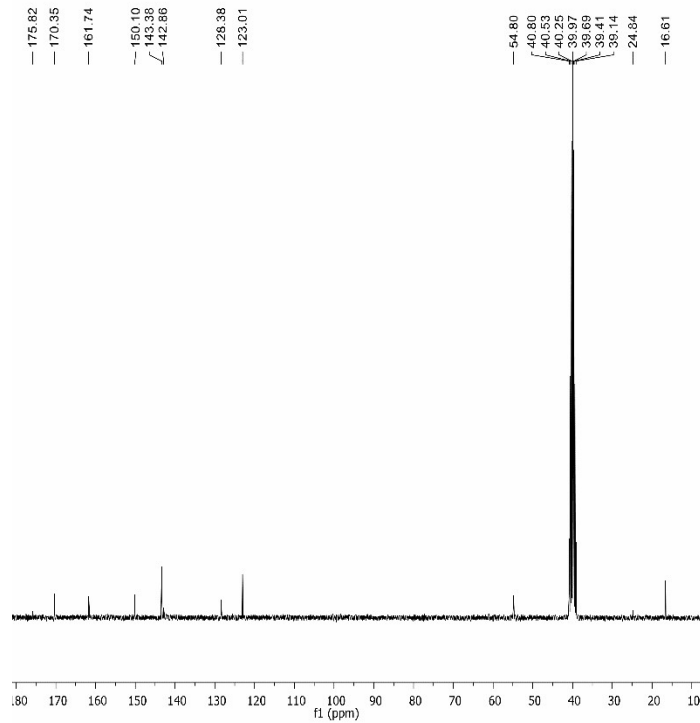

Figure 6.2. <sup>13</sup>C NMR spectrum of 6

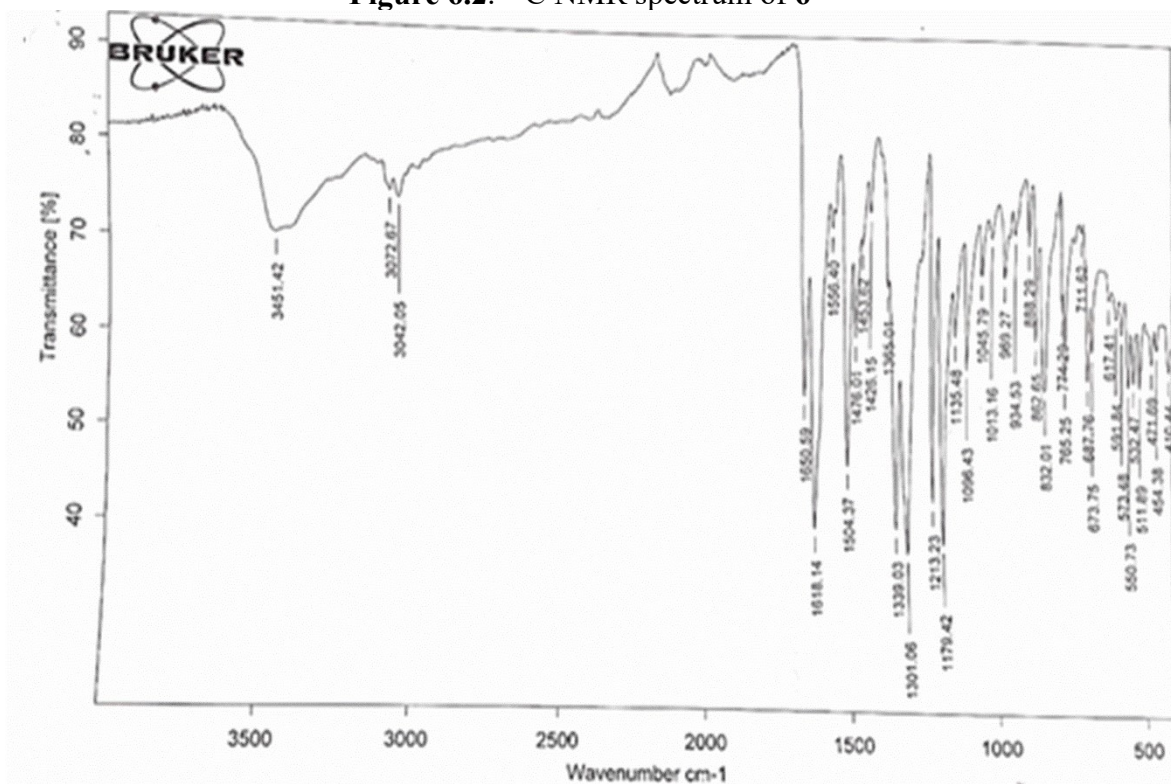

Figure 6.3. Representative FT-IR spectrum of 6

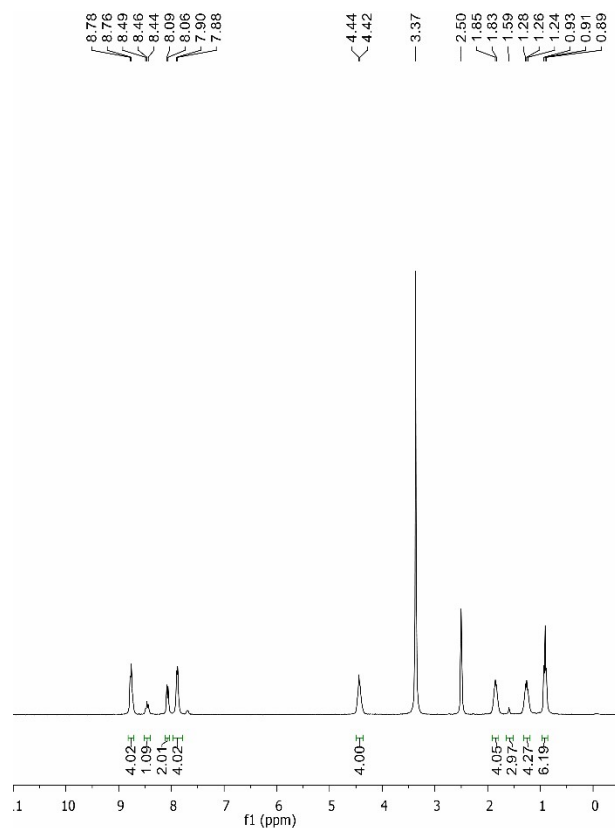

Figure 7.1.  $^1\text{H}$  NMR spectrum of 7

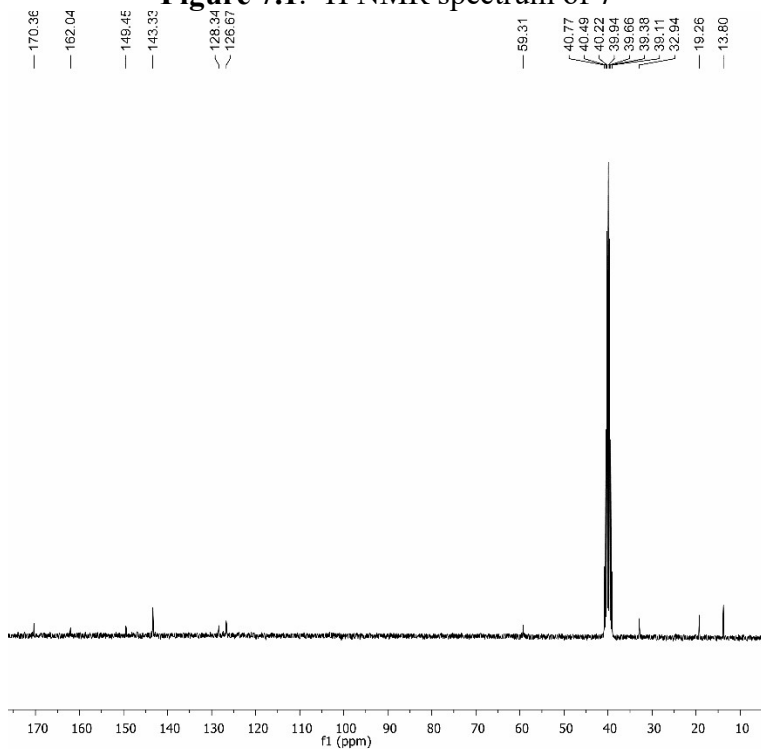

Figure 7.2.  $^{13}\text{C}$  NMR spectrum of 7



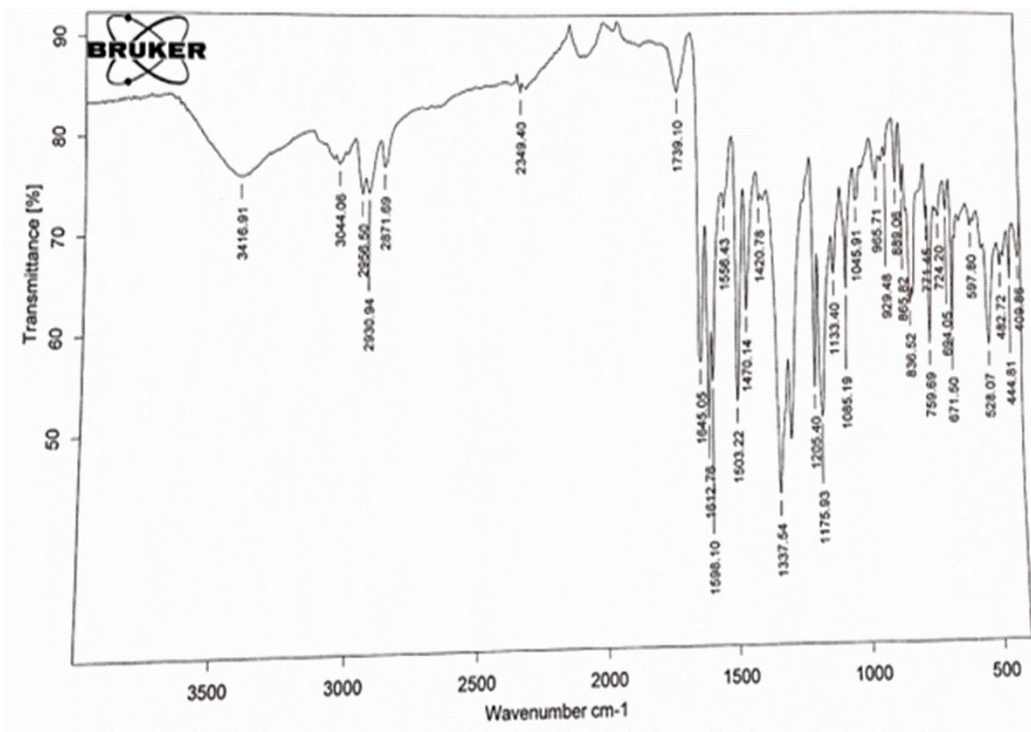

Figure 7.3. Representative FT-IR spectrum of 7

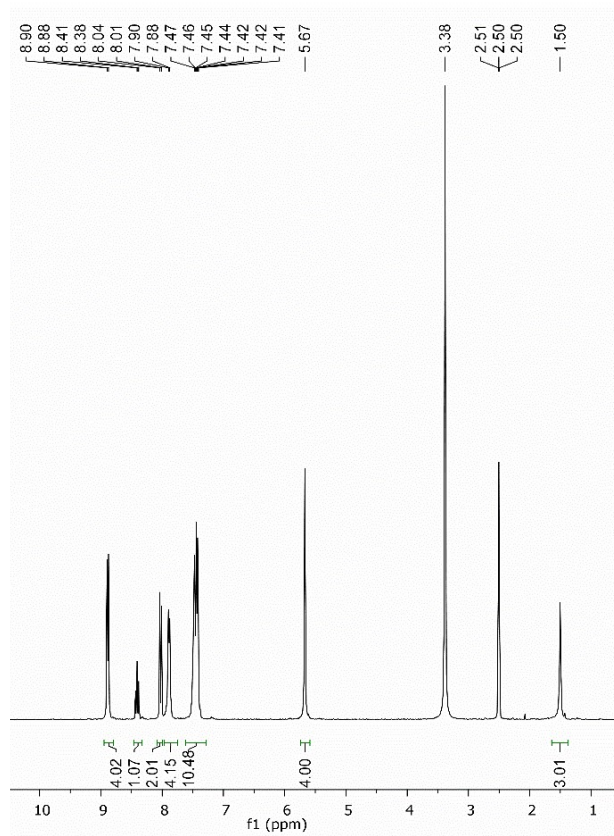

Figure 8.1. <sup>1</sup>H NMR spectrum of 8

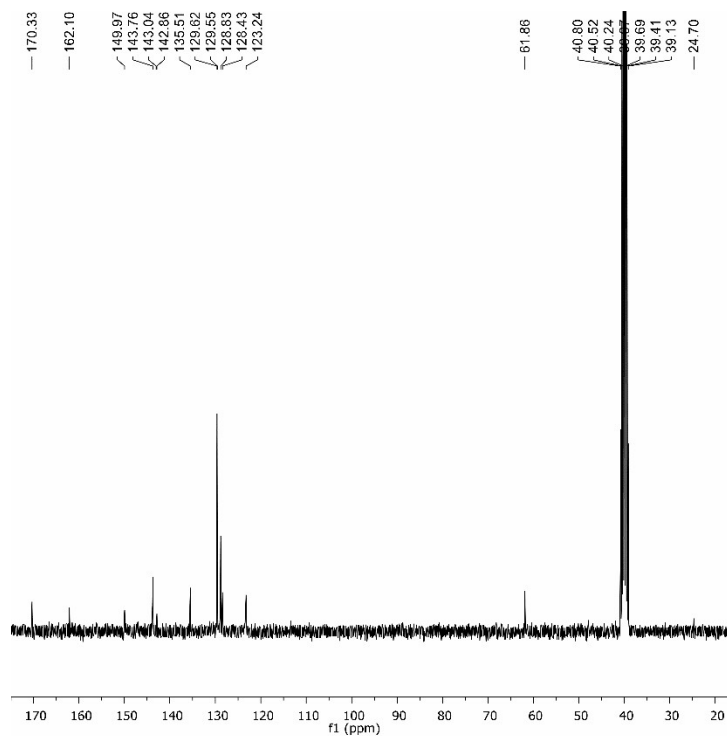

Figure 8.2.  $^{13}\text{C}$  NMR spectrum of **8**

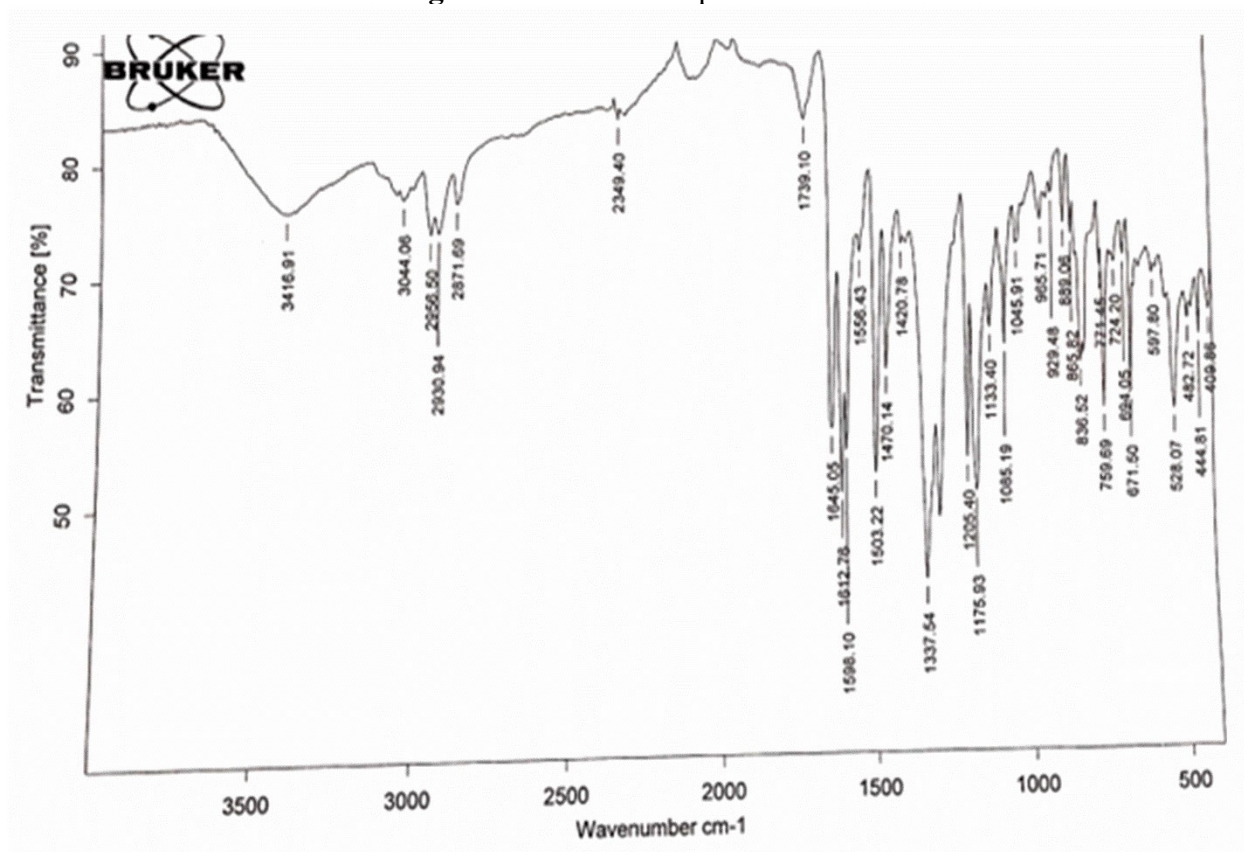

Figure 8.3. Representative FT-IR spectrum of **8**



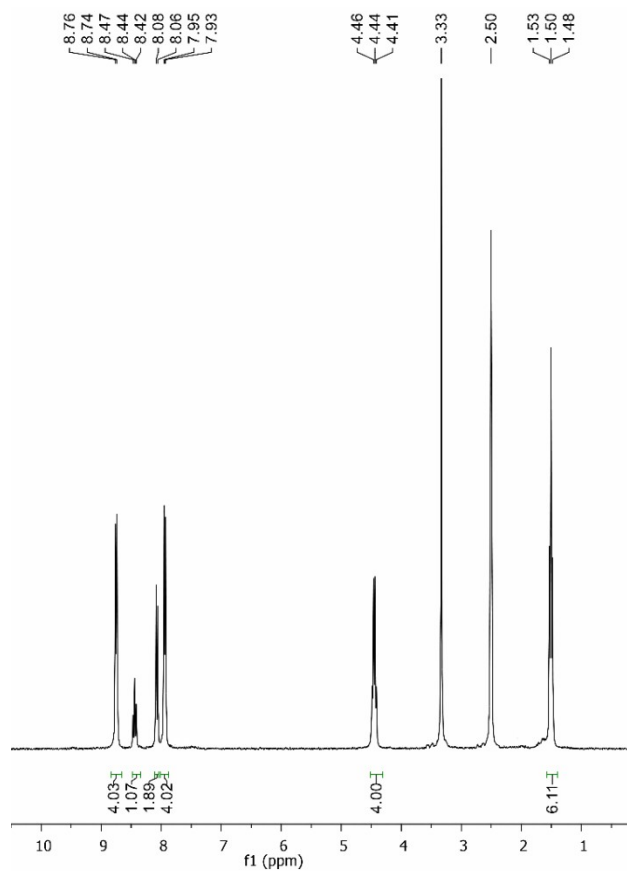

Figure 9.1.  $^1\text{H}$  NMR spectrum of **9**

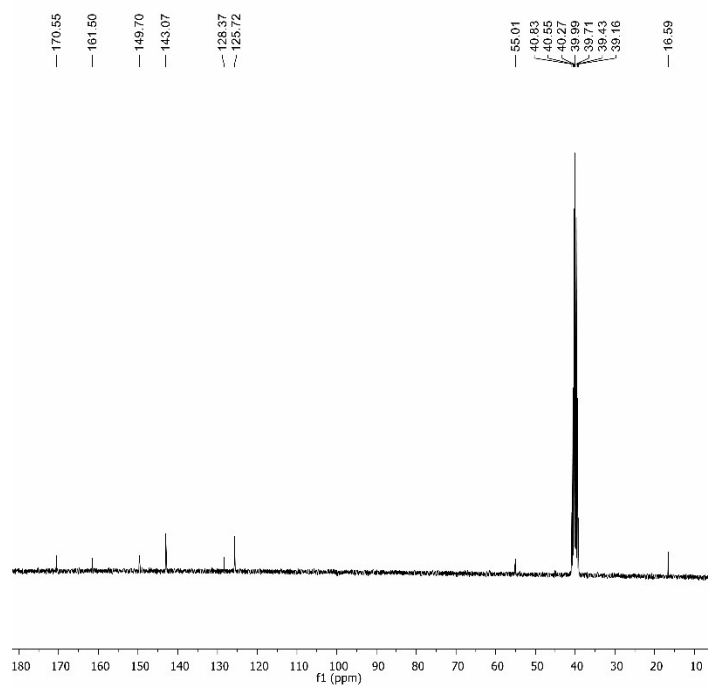

Figure 9.2.  $^{13}\text{C}$  NMR spectrum of **9**

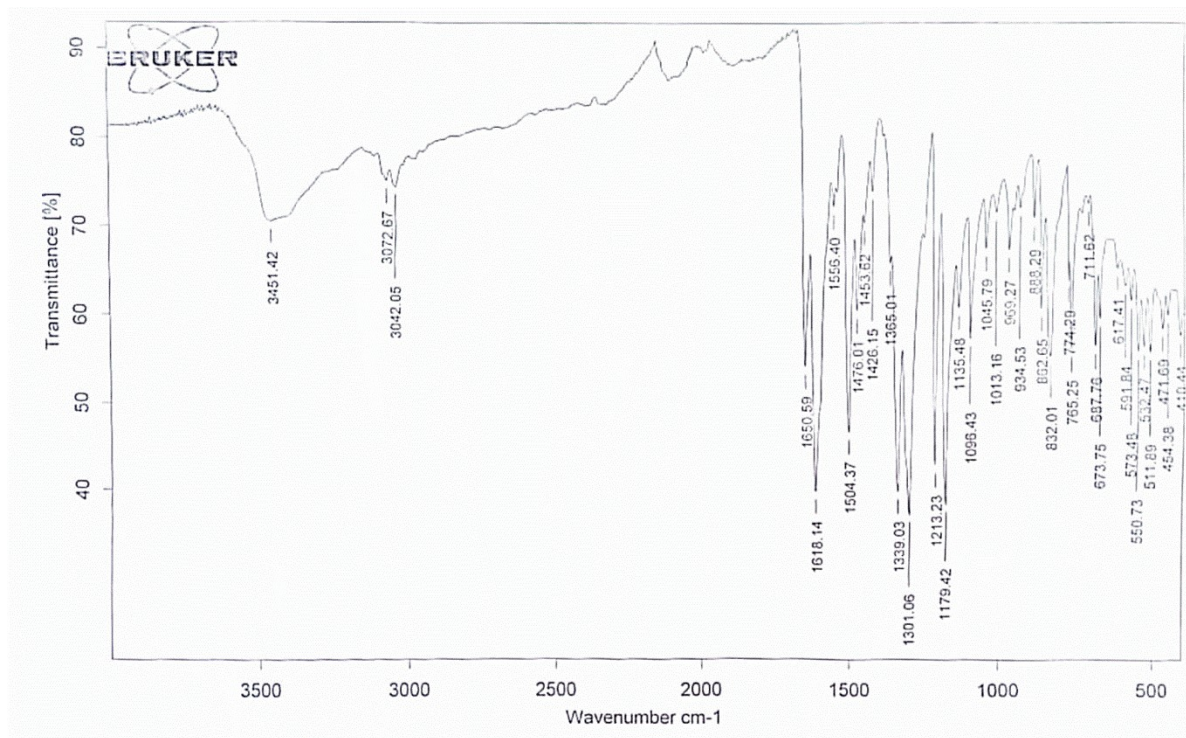

Figure 9.3. Representative FT-IR spectrum of **9**

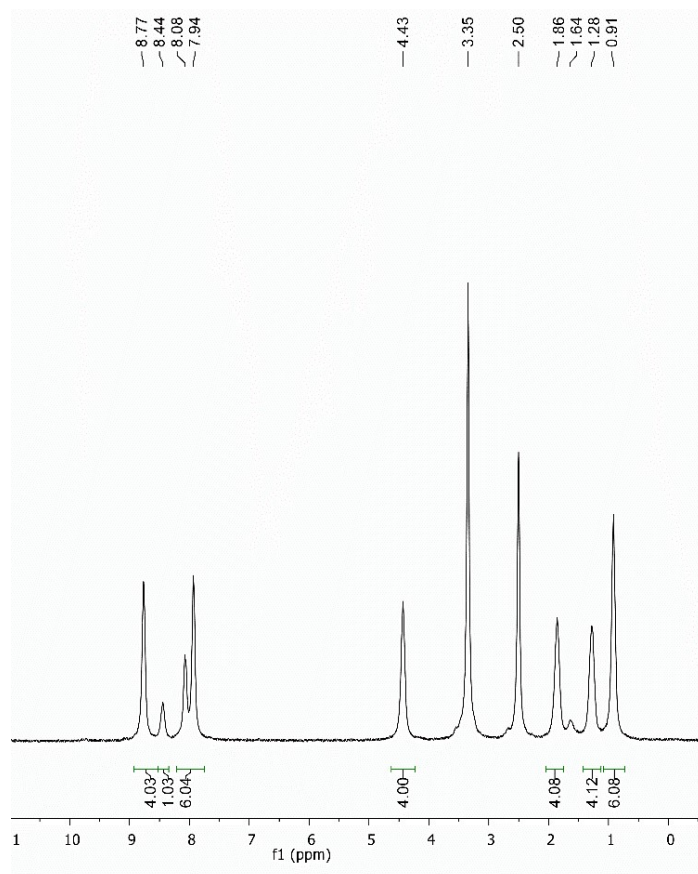

Figure 10.1. <sup>1</sup>H NMR spectrum of **10**

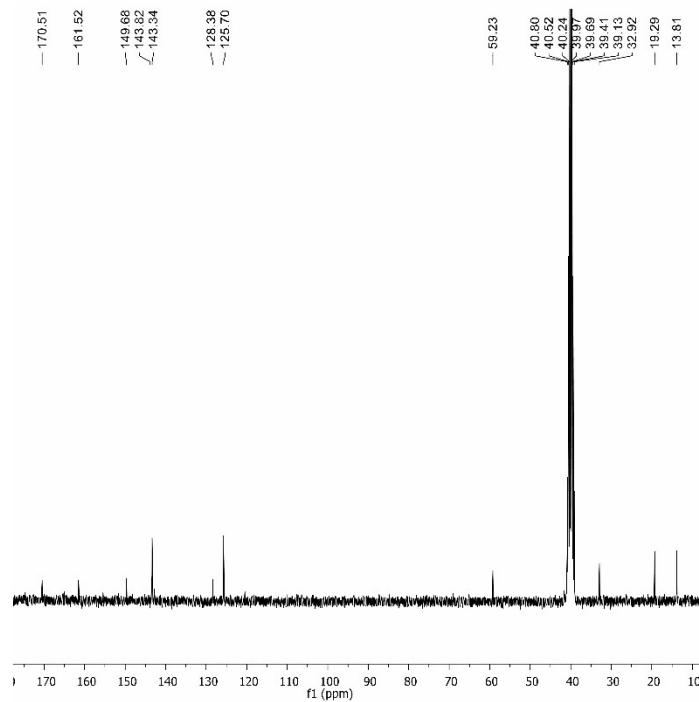

Figure 10.2.  $^{13}\text{C}$  NMR spectrum of **10**

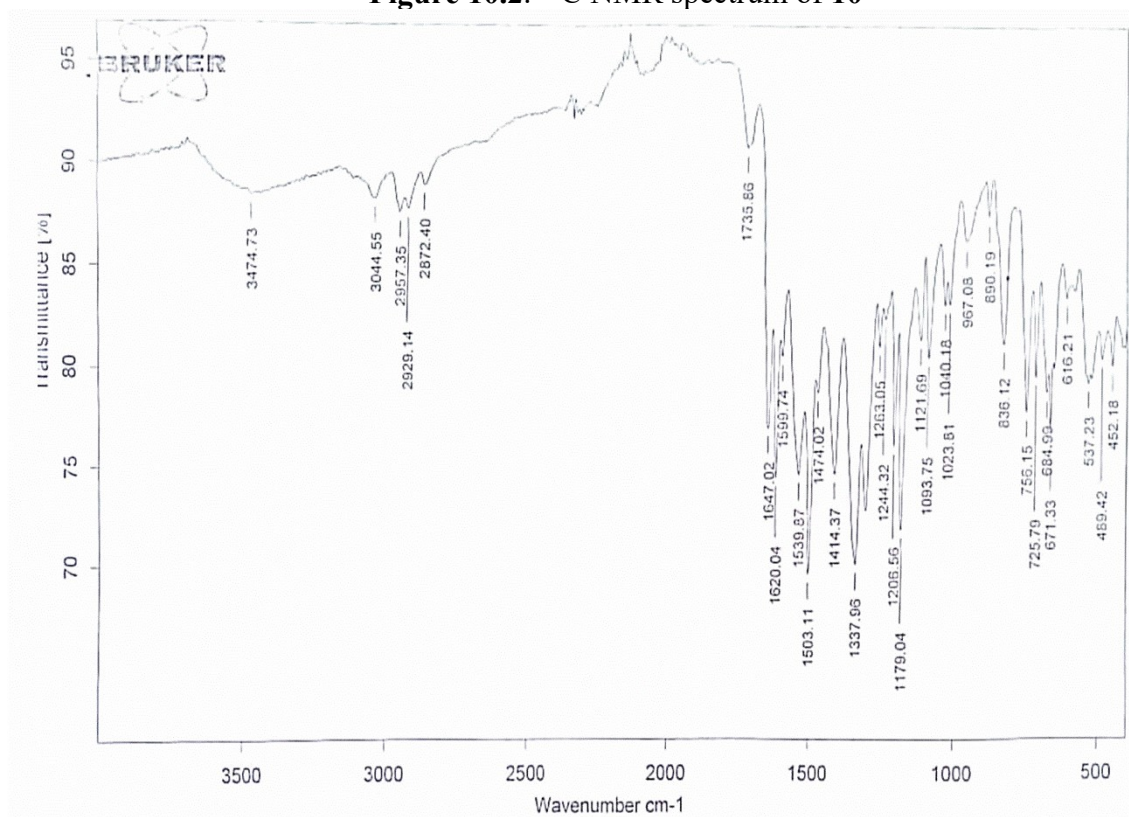

Figure 10.3. Representative FT-IR spectrum of **10**

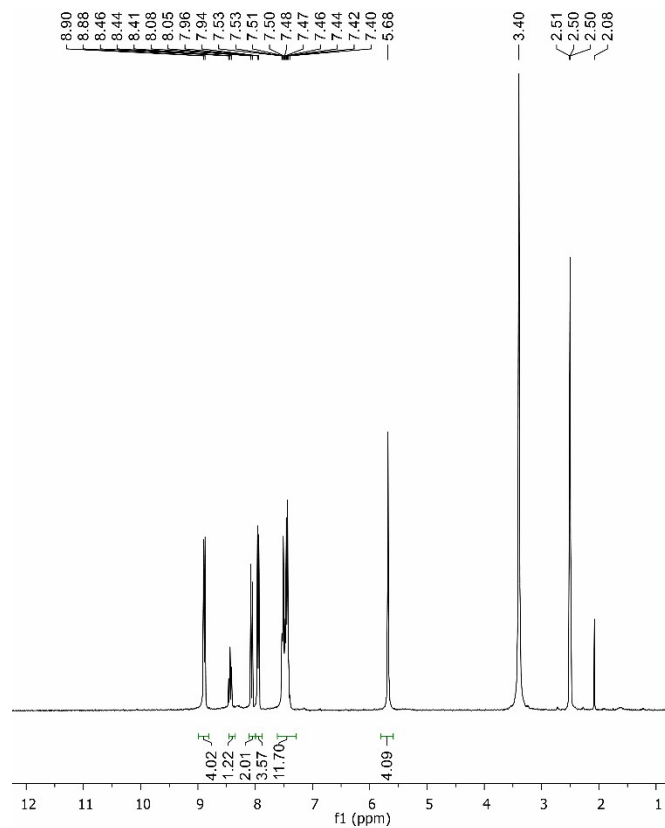

Figure 11.1.  $^1\text{H}$  NMR spectrum of **11**

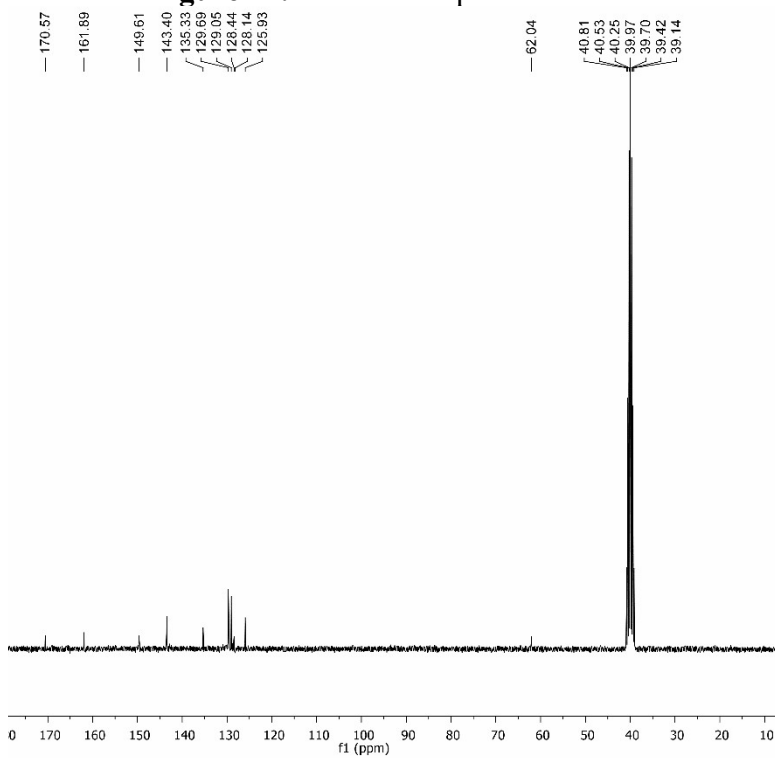

Figure 11.2.  $^{13}\text{C}$  NMR spectrum of **11**

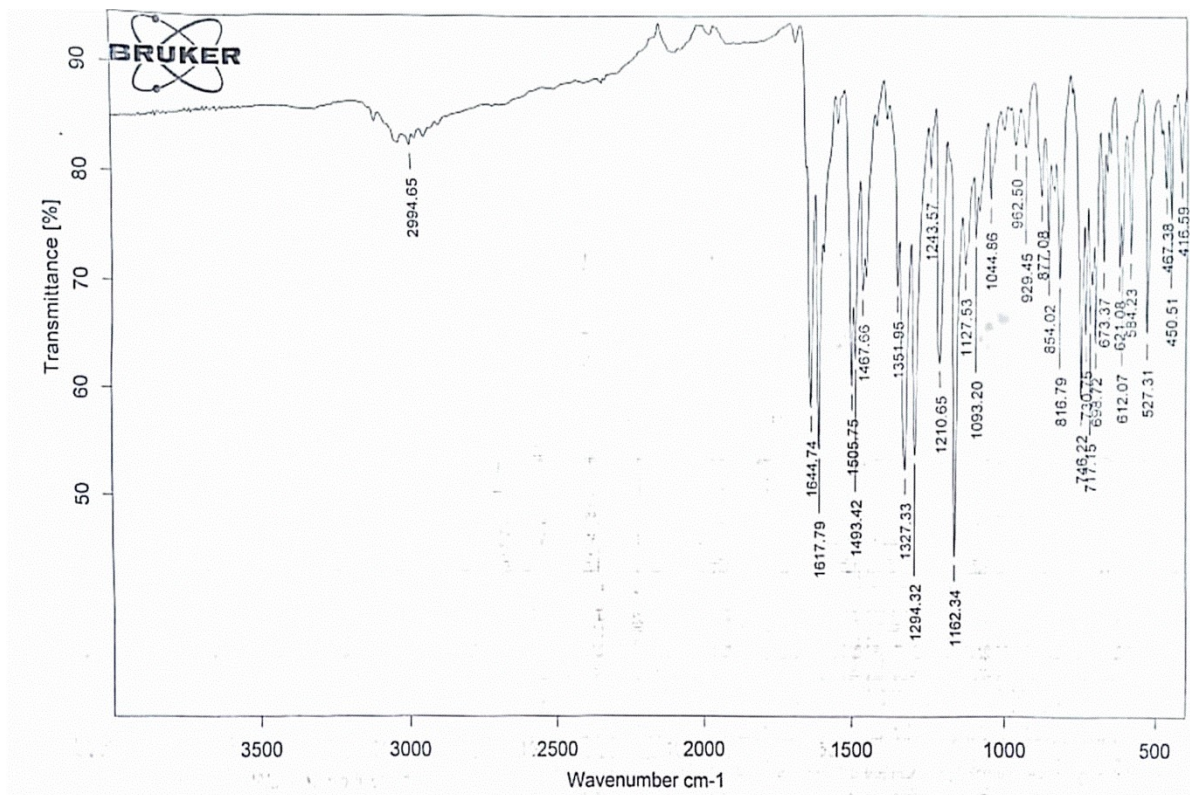

Figure 11.3. Representative FT-IR spectrum of 11



Crystallographic Data: CCDC numbers of **2**, **4** and **11** are 2281737, 2281738, 2281739.

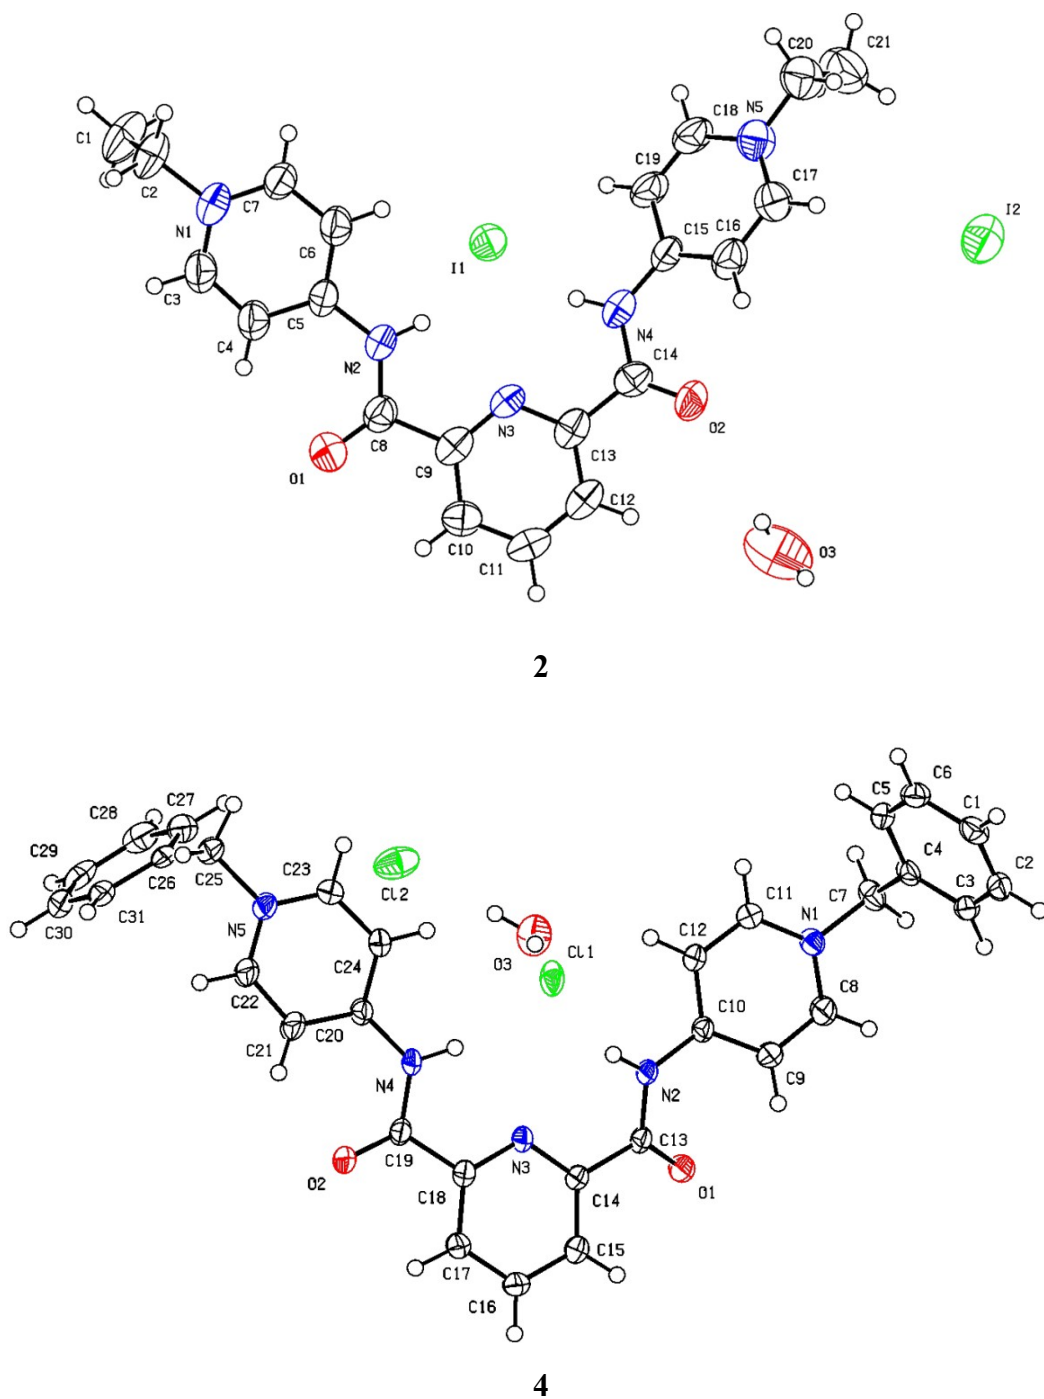

Figure S12. ORTEP diagrams of **2** and **4**



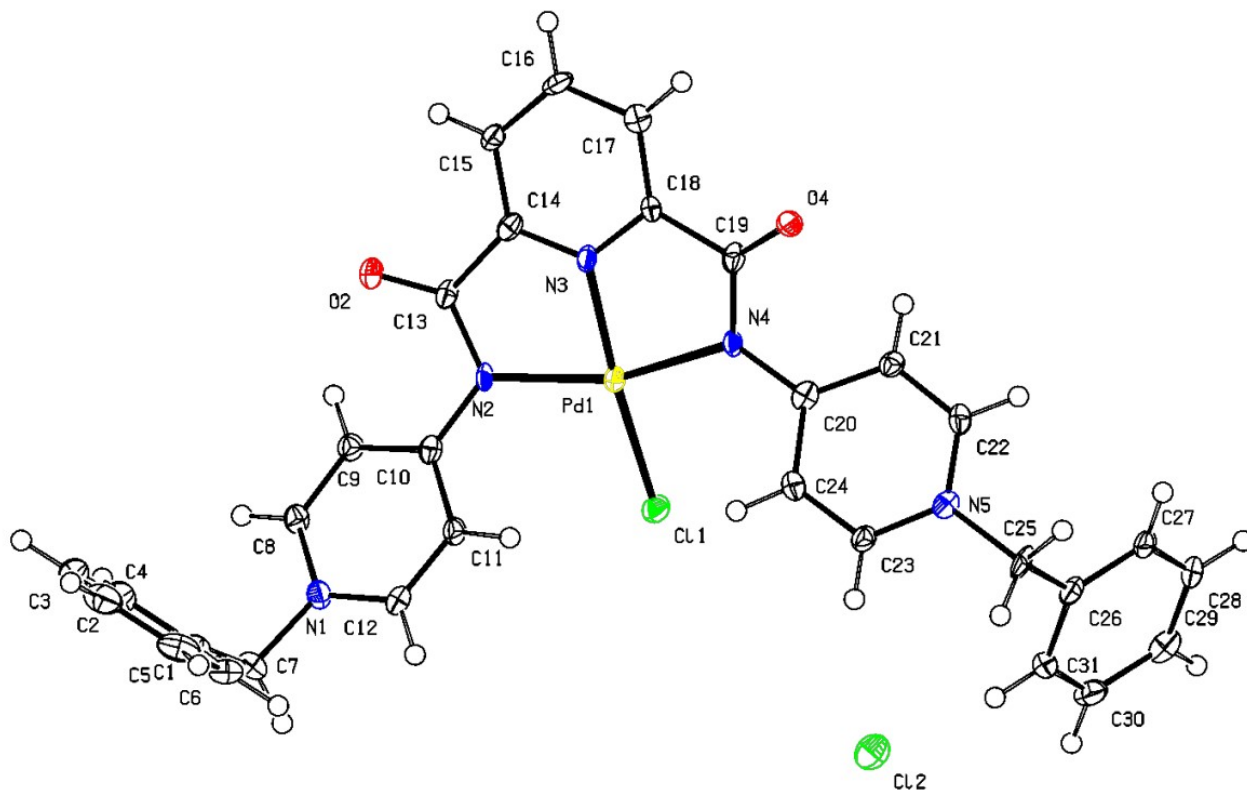

11

**Figure S13.** ORTEP diagrams of **11**

Single crystals of **2** and **4** suitable for x-ray diffraction analysis, were obtained *via* slow evaporation method. **2** was recrystallized from saturated mixture of water, methanol and acetonitrile. **4** was crystallized out from methanol. ORTEP diagrams of **2** and **4** are given in Figure S12 which evaluates the successful ethylation and benzylation of **1** respectively. The C-N bond distance of N2-C5 and N4-C15 were 1.378(1) Å and 1.385(2) Å respectively in **2** while in **4**, C20-N4 and C10-N2 were 1.382(5) Å and 1.391(6) Å respectively, which is closed to C-N bond length 1.47 Å<sup>1</sup>. In **2** the bond lengths of O1-C8 and O2-C14 were 1.227(2) Å and C14 1.202(2) Å respectively while in **4** the bond lengths of C13-O1 and C19-O2 were 1.218(4) Å and 1.214(6) Å respectively, representing carbon oxygen double bond character.

Single crystal of **11** suitable for x-ray diffraction analysis was grown in mixture of acetonitrile, methanol and water *via* slow evaporation method. An ORTEP and packing diagram of **11** is given in Figure S12. It has P2<sub>1</sub>/n space group and two molecules packed in unit cell. The C20-N4 and C10-N2 bond lengths extended from 1.382(5) Å to 1.388(8) Å and 1.391(6) Å to 1.394(6) Å in contrast to its respective proligand **4**, due to the shifting of electron density from nitrogen to the palladium. Palladium coordinated with three nitrogen atoms (N2, N3 and N4) of ligand and one chlorine atom (Cl1). The angle between palladium and the three nitrogen atoms (N2-Pd1-N3) and (N3-Pd1-N4) were 80.8(2)° and 80.7(2)° respectively. This distorted square planner geometry of the complex may be due to the rigidity of tridentate ligand.

## Electrochemical Activity:

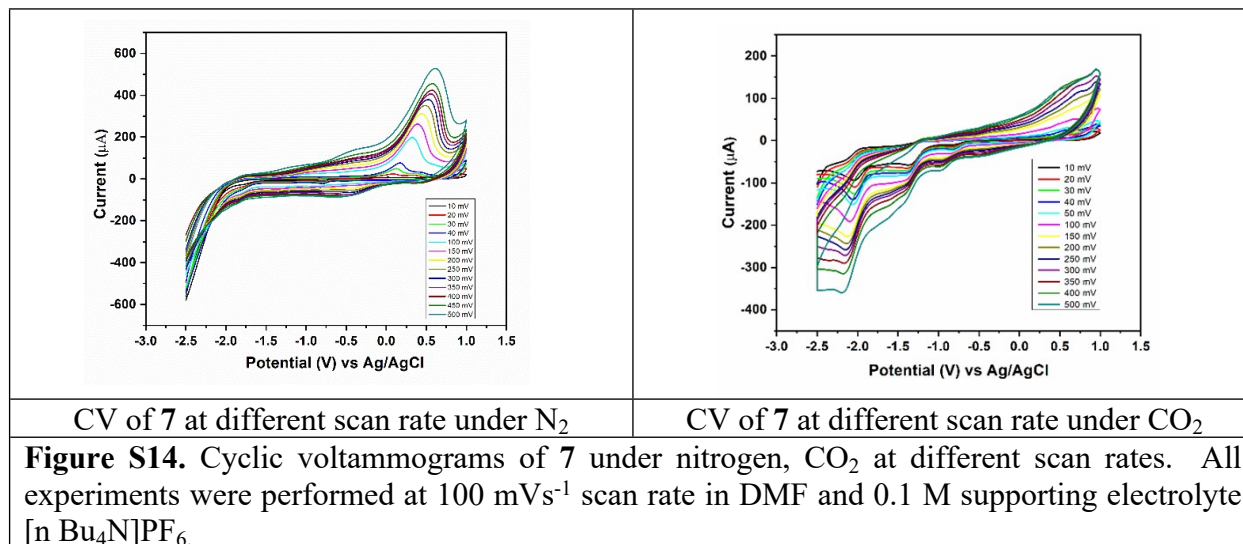

## Plots of Peak Current vs. (Scan Rate)<sup>1/2</sup>

Randles-Sevcik equation describes that the peak current is directly proportional to the square root of the scan rate in an electrochemical redox reaction. A linear plot of the peak current vs the square root of the scan rate demonstrates that the electroactive species in a redox reaction are freely diffusing. Randles-Sevcik plots of the 2 mM complexes (7) under an inert atmosphere and  $\text{CO}_2$  are given in Figure S15.

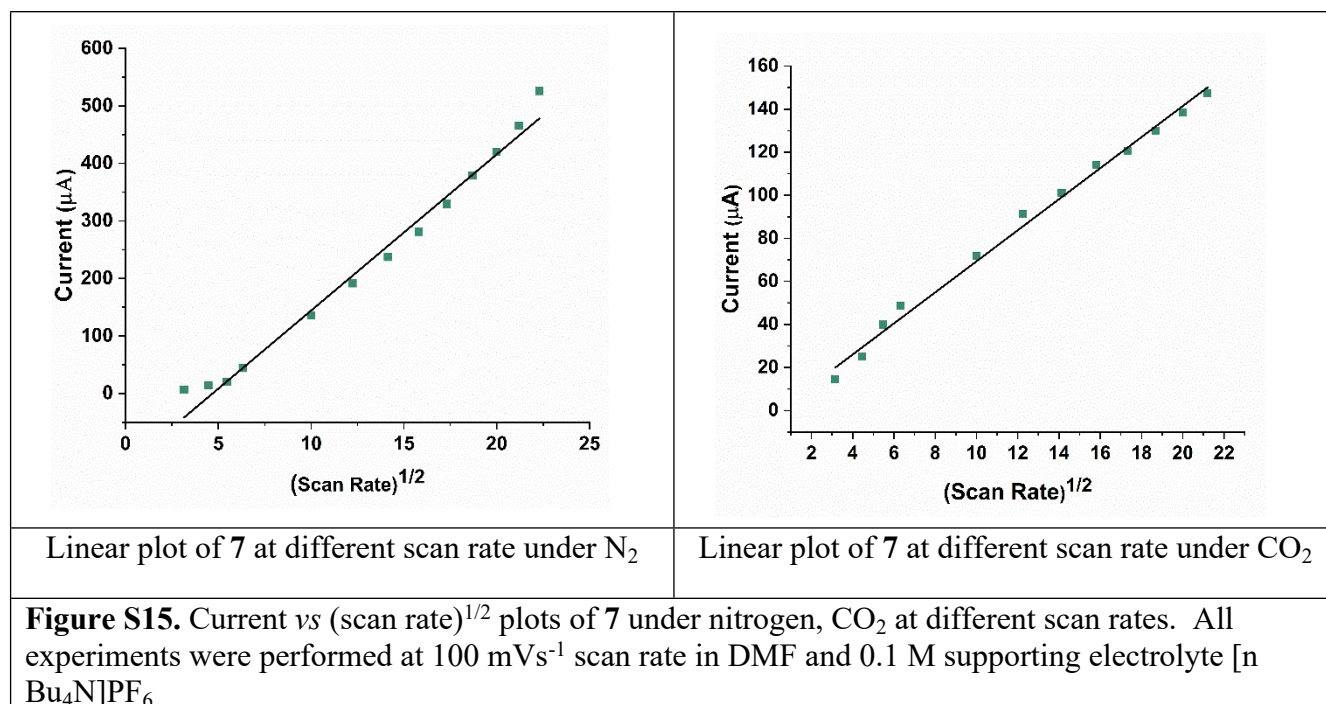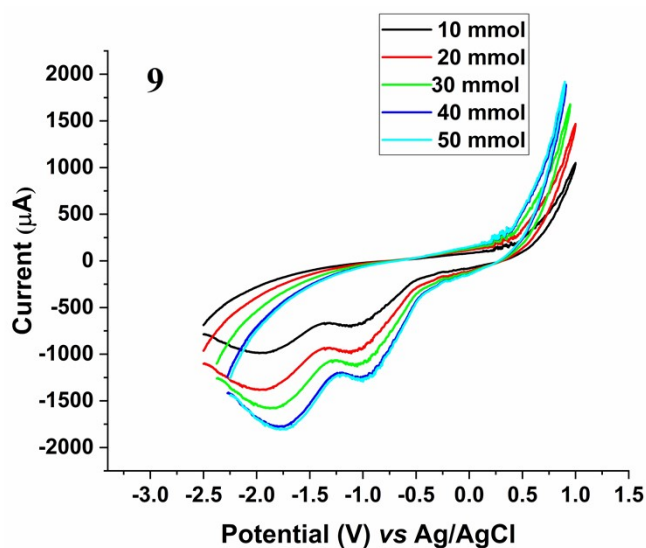

**Figure S16.** Cyclic voltammograms of **9** under CO<sub>2</sub> + TFA at different concentrations. All experiments were performed at 100 mVs<sup>-1</sup> scan rate in DMF and 0.1 M supporting electrolyte ([n Bu<sub>4</sub>N]PF<sub>6</sub>)

#### References:

- Allen, F. H.; Kennard, O.; Watson, D. G.; Brammer, L.; Orpen, A. G.; Taylor, R., Tables of bond lengths determined by X-ray and neutron diffraction. Part 1. Bond lengths in organic compounds. *Journal of the Chemical Society, Perkin Transactions 2* **1987**, (12), S1-S19.
